# Supplementary material for: [Retracted] Identification of Biomarkers for Predicting Allograft Rejection following Kidney Transplantation Based on the Weighted Gene Coexpression Network Analysis
Source: Hindawi journal article supplement (doi:10.1155/2021/9933136), 2021-01-01
Supplement: f1 [file 9933136.f1.zip]

Archive with 2 entries (2 files):
- 9933136.f1/Supplementary material 1.docx
- 9933136.f1/Supplementary material 2.docx
