# Supplementary material for: [Retracted] Identification of Biomarkers for Predicting Allograft Rejection following Kidney Transplantation Based on the Weighted Gene Coexpression Network Analysis
Source: Hindawi journal article supplement (doi:10.1155/2021/9933136), 2021-01-01
Supplement: f1 [file 9933136.f1.zip › 9933136.f1/Supplementary material 1.docx]

| **ONTOLOGY** | **ID** | **Description** | **GeneRatio** | **BgRatio** | **pvalue** | **p.adjust** | **qvalue** | **geneID** | **Count** |
| --- | --- | --- | --- | --- | --- | --- | --- | --- | --- |
| BP | GO:0050863 | regulation of T cell activation | 65/2077 | 314/18670 | 5.08E-07 | 0.001484 | 0.0014 | IFNB1/RAG1/IL4/PLA2G2D/ADA/ADAM8/AP3B1/BTN2A2/CARD11/CBFB/CCDC88B/CCR7/CD1D/CD27/CD274/CD3E/CD40LG/CD47/CD5/CD55/CD6/CD80/CD83/CLEC4G/CLECL1/CYLD/DROSHA/EBI3/GPNMB/GRB2/HES1/IDO1/IL10/IL12B/IL12RB1/IL2/IL2RA/IL4R/IRF1/IRF4/LAG3/LAT/PAK1/PNP/RAC1/RASAL3/RIPK2/RIPK3/SIRPG/SIT1/SOCS1/SOCS5/SOCS6/SYK/TESPA1/TIGIT/TNFAIP8L2/YES1/ZAP70/ZNF683/BCL10/IL23A/TNFSF18/CLC/IFNL1 | 65 |
| BP | GO:0042110 | T cell activation | 87/2077 | 464/18670 | 6.50E-07 | 0.001484 | 0.0014 | IFNB1/RAG1/IFNW1/IL4/PLA2G2D/ADA/ADAM8/AP3B1/AZI2/B2M/BTN2A2/BTN3A1/CARD11/CASP8/CBFB/CCDC88B/CCR7/CD1D/CD27/CD274/CD3E/CD40LG/CD47/CD5/CD55/CD6/CD80/CD83/CLEC4G/CLEC7A/CLECL1/CYLD/DROSHA/EBI3/ELF4/FKBP1B/GPNMB/GPR18/GRB2/HES1/IDO1/IL10/IL12B/IL12RB1/IL2/IL2RA/IL4R/IRF1/IRF4/JMJD6/LAG3/LAT/PAK1/PAX1/PNP/PSMB10/RAB27A/RAC1/RASAL3/RIPK2/RIPK3/SATB1/SIRPG/SIT1/SLAMF6/SOCS1/SOCS5/SOCS6/STAT3/SYK/TCF7/TCIRG1/TESPA1/TIGIT/TNFAIP8L2/TNFRSF4/WAS/YES1/ZAP70/ZNF683/BCL10/CDH26/IL23A/TNFSF18/CLC/CLEC4E/IFNL1 | 87 |
| BP | GO:0007159 | leukocyte cell-cell adhesion | 68/2077 | 337/18670 | 7.46E-07 | 0.001484 | 0.0014 | IFNB1/RAG1/IL4/PLA2G2D/ADA/ADAM8/AP3B1/BTN2A2/CARD11/CBFB/CCDC88B/CCL28/CCR7/CD1D/CD27/CD274/CD3E/CD40LG/CD47/CD5/CD55/CD6/CD80/CD83/CLEC4G/CLECL1/CYLD/EBI3/GPNMB/GRB2/HES1/IDO1/IL10/IL12B/IL12RB1/IL2/IL2RA/IL4R/IRF1/ITGB7/KLF4/LAG3/NR4A3/PAK1/PNP/PTAFR/RAC1/RASAL3/RIPK2/SELL/SIRPG/SOCS1/SOCS5/SOCS6/STK10/SYK/TESPA1/TIGIT/TNF/TNFAIP8L2/YES1/ZAP70/BCL10/CD177/IL23A/CLEC4M/IFNL1/UMOD | 68 |
| BP | GO:1903037 | regulation of leukocyte cell-cell adhesion | 62/2077 | 304/18670 | 1.56E-06 | 0.00233 | 0.002198 | IFNB1/RAG1/IL4/PLA2G2D/ADA/ADAM8/AP3B1/BTN2A2/CARD11/CBFB/CCDC88B/CCL28/CCR7/CD1D/CD27/CD274/CD3E/CD40LG/CD47/CD5/CD55/CD6/CD80/CD83/CLEC4G/CLECL1/CYLD/EBI3/GPNMB/GRB2/HES1/IDO1/IL10/IL12B/IL12RB1/IL2/IL2RA/IL4R/IRF1/KLF4/LAG3/NR4A3/PAK1/PNP/PTAFR/RAC1/RASAL3/RIPK2/SIRPG/SOCS1/SOCS5/SOCS6/SYK/TESPA1/TIGIT/TNF/TNFAIP8L2/YES1/ZAP70/BCL10/IL23A/IFNL1 | 62 |
| BP | GO:0022409 | positive regulation of cell-cell adhesion | 54/2077 | 255/18670 | 2.23E-06 | 0.00256 | 0.002415 | RAG1/IL4/ADA/ADAM19/ADAM8/ALOX15/AP3B1/BTN2A2/CARD11/CBFB/CCDC88B/CCR7/CD1D/CD27/CD274/CD3E/CD40LG/CD47/CD5/CD55/CD6/CD80/CD83/CITED2/CLECL1/CXCL13/CYLD/EBI3/GRB2/HES1/IL10/IL12B/IL12RB1/IL2/IL2RA/IL4R/NR4A3/PAK1/PIEZO1/PNP/PTAFR/RAC1/RASAL3/RIPK2/SIRPG/SOCS1/SOCS5/SYK/TESPA1/TNF/YES1/ZAP70/BCL10/IL23A | 54 |
| BP | GO:1903039 | positive regulation of leukocyte cell-cell adhesion | 48/2077 | 218/18670 | 2.57E-06 | 0.00256 | 0.002415 | RAG1/IL4/ADA/ADAM8/AP3B1/BTN2A2/CARD11/CBFB/CCDC88B/CCR7/CD1D/CD27/CD274/CD3E/CD40LG/CD47/CD5/CD55/CD6/CD80/CD83/CLECL1/CYLD/EBI3/GRB2/HES1/IL12B/IL12RB1/IL2/IL2RA/IL4R/NR4A3/PAK1/PNP/PTAFR/RAC1/RASAL3/RIPK2/SIRPG/SOCS1/SOCS5/SYK/TESPA1/TNF/YES1/ZAP70/BCL10/IL23A | 48 |
| BP | GO:0050870 | positive regulation of T cell activation | 45/2077 | 202/18670 | 3.77E-06 | 0.003213 | 0.003031 | RAG1/IL4/ADA/ADAM8/AP3B1/BTN2A2/CARD11/CBFB/CCDC88B/CCR7/CD1D/CD27/CD274/CD3E/CD40LG/CD47/CD5/CD55/CD6/CD80/CD83/CLECL1/CYLD/EBI3/GRB2/HES1/IL12B/IL12RB1/IL2/IL2RA/IL4R/PAK1/PNP/RAC1/RASAL3/RIPK2/SIRPG/SOCS1/SOCS5/SYK/TESPA1/YES1/ZAP70/BCL10/IL23A | 45 |
| BP | GO:0046631 | alpha-beta T cell activation | 34/2077 | 138/18670 | 5.76E-06 | 0.003892 | 0.003672 | PLA2G2D/ADA/AP3B1/CBFB/CD274/CD3E/CD55/CD80/CD83/EBI3/ELF4/GPR18/IL12B/IL12RB1/IL2/IL4R/IRF1/IRF4/PAX1/PNP/RASAL3/RIPK2/SATB1/SLAMF6/SOCS1/SOCS5/STAT3/SYK/TCF7/TCIRG1/ZAP70/ZNF683/CDH26/IL23A | 34 |
| BP | GO:0031349 | positive regulation of defense response | 72/2077 | 384/18670 | 5.87E-06 | 0.003892 | 0.003672 | IFNB1/GPSM3/LBP/TREM2/ABCC1/ADAM8/AIM2/CADM1/CARD11/CCL1/CCL18/CCR7/CD1D/CD226/CD47/CD6/CHUK/CLEC4C/CLEC7A/CTSC/CUL1/DHX58/IDO1/IL12B/IL17RA/IL17RB/IL18RAP/IL1RL1/IL2/IRGM/ITGA2/KLKB1/KRAS/LAG3/LTA/MIR142/MMP12/MYD88/NCR3/NFKBIA/NLRC5/NOD1/OSMR/PAK1/PARP9/PSMA8/PSMB1/PSMB10/PSMB9/PSMC2/PSMC6/PSMD6/RIPK2/SH2D1A/SKP1/SLAMF6/SNCA/SUCNR1/SYK/TGM2/TNF/MUC2/MUC5AC/PSMA3/ULBP3/BCL10/FBXW11/IL23A/SH2D1B/TRIM15/AGT/CLEC4E | 72 |
| BP | GO:0045582 | positive regulation of T cell differentiation | 24/2077 | 83/18670 | 7.48E-06 | 0.004463 | 0.004211 | RAG1/IL4/ADA/ADAM8/AP3B1/BTN2A2/CBFB/CD27/CD80/CD83/CYLD/IL12B/IL12RB1/IL2/IL2RA/IL4R/PNP/RIPK2/SOCS1/SOCS5/SYK/TESPA1/ZAP70/IL23A | 24 |
| BP | GO:0032609 | interferon-gamma production | 29/2077 | 113/18670 | 1.18E-05 | 0.006417 | 0.006054 | AZI2/BTN3A1/C1QBP/CCR7/CD226/CD274/CD3E/CD47/CD96/CLEC7A/EBI3/IL10/IL12B/IL12RB1/IL18RAP/IL1RL1/IL2/IL27RA/ISG15/LTA/RIPK2/RIPK3/SLAMF6/TCIRG1/TNF/TRIM27/HMHB1/IL23A/IFNL1 | 29 |
| BP | GO:0045088 | regulation of innate immune response | 59/2077 | 305/18670 | 1.52E-05 | 0.007364 | 0.006948 | IFNB1/LBP/TREM2/ADAM8/ADAR/AIM2/APOE/APPL2/BIRC2/CADM1/CARD11/CD1D/CD226/CD96/CHUK/CLEC4C/CUL1/DHX58/IFNGR2/IL12B/IL18RAP/IRF1/IRGM/JAK1/KRAS/LAG3/LRP8/MMP12/NCR3/NLRC5/PAK1/PARP14/PARP9/PSMA8/PSMB1/PSMB10/PSMB9/PSMC2/PSMC6/PSMD6/RNASEL/SH2D1A/SKP1/SLAMF6/SOCS1/SOCS3/STAT1/SYK/TNFAIP3/XIAP/YTHDF2/MUC2/MUC5AC/PSMA3/ULBP3/BCL10/FBXW11/SH2D1B/CLEC4E | 59 |
| BP | GO:0022407 | regulation of cell-cell adhesion | 73/2077 | 402/18670 | 1.60E-05 | 0.007364 | 0.006948 | IFNB1/RAG1/IL4/PLA2G2D/ADA/ADAM19/ADAM8/ALOX15/AP3B1/BMP2/BTN2A2/CARD11/CBFB/CCDC88B/CCL28/CCR7/CD1D/CD27/CD274/CD3E/CD40LG/CD47/CD5/CD55/CD6/CD80/CD83/CITED2/CLEC4G/CLECL1/CXCL13/CYLD/EBI3/EFNA5/EPCAM/GPNMB/GRB2/HES1/IDO1/IL10/IL12B/IL12RB1/IL2/IL2RA/IL4R/IRF1/KLF4/LAG3/NR4A3/PAK1/PIEZO1/PNP/PPM1F/PTAFR/RAC1/RASAL3/RIPK2/SIRPG/SOCS1/SOCS5/SOCS6/SYK/TESPA1/TIGIT/TNF/TNFAIP8L2/YES1/YTHDF2/ZAP70/BCL10/IL23A/IFNL1/PCDH8 | 73 |
| BP | GO:0006513 | protein monoubiquitination | 20/2077 | 66/18670 | 1.98E-05 | 0.008179 | 0.007717 | RAG1/BIRC2/CBL/CDC73/CUL1/CUL3/DDB1/HUWE1/KBTBD8/KLHL22/PAF1/PCGF1/PEX12/SKP1/TRIM21/UBB/UBE2B/UBE2E1/UBE2R2/UBE2W | 20 |
| BP | GO:0043281 | regulation of cysteine-type endopeptidase activity involved in apoptotic process | 45/2077 | 215/18670 | 2.06E-05 | 0.008179 | 0.007717 | RAG1/VIL1/CASP8AP2/ANP32B/ARL6IP1/ARRB1/BID/BIRC2/CASP10/CASP8/CASP9/CD27/CLEC7A/COL4A3/CRYAB/CYCS/F3/FASLG/HSPE1/IGBP1/KLF4/LAMP3/MAPT/MICAL1/MMP9/MTCH1/NOD1/PML/PPM1F/RNF34/RPS27L/SIAH2/SNCA/SYK/TFAP2B/TNF/TNFAIP8/TNFRSF10A/XIAP/YWHAE/CASC2/CASP5/WNT9A/BCL10/IFT57 | 45 |
| BP | GO:0051249 | regulation of lymphocyte activation | 84/2077 | 485/18670 | 2.39E-05 | 0.008693 | 0.008202 | IFNB1/RAG1/CD38/IL4/PLA2G2D/IGLL5/ADA/ADAM8/AP3B1/BTN2A2/CARD11/CBFB/CCDC88B/CCR7/CD1D/CD22/CD27/CD274/CD3E/CD40LG/CD47/CD5/CD55/CD6/CD80/CD83/CLEC4G/CLEC7A/CLECL1/CYLD/DROSHA/EBI3/GPNMB/GRB2/HES1/IDO1/IKZF3/IL10/IL12B/IL12RB1/IL2/IL27RA/IL2RA/IL4R/IRF1/IRF4/IRS2/LAG3/LAT/LST1/MSH2/MZB1/NFAM1/PAK1/PIBF1/PNP/RAC1/RASAL3/RIPK2/RIPK3/RNF41/SIRPG/SIT1/SOCS1/SOCS5/SOCS6/SYK/TESPA1/TIGIT/TNFAIP3/TNFAIP8L2/TNFRSF4/TNIP2/TP53BP1/YES1/ZAP70/ZNF683/BCL10/IL23A/PGLYRP2/TNFSF18/CLC/FGF10/IFNL1 | 84 |
| BP | GO:0002831 | regulation of response to biotic stimulus | 72/2077 | 400/18670 | 2.48E-05 | 0.008693 | 0.008202 | IFNB1/LBP/TREM2/ADAM8/ADAR/AIM2/APOE/APPL2/BIRC2/C1QBP/CADM1/CARD11/CD180/CD1D/CD226/CD274/CD55/CD96/CHUK/CLEC4C/CUL1/DHX58/IFNGR2/IL12B/IL12RB1/IL18RAP/IL2RA/IRF1/IRGM/JAK1/KRAS/LAG3/LRP8/MMP12/NCR3/NLRC5/NOD1/PAK1/PARP14/PARP9/PCBP2/PSMA8/PSMB1/PSMB10/PSMB9/PSMC2/PSMC6/PSMD6/RIPK2/RNASEL/SH2D1A/SKP1/SLAMF6/SOCS1/SOCS3/STAT1/SYK/TNFAIP3/TRAF3/XIAP/YTHDF2/MUC2/MUC5AC/PSMA3/ULBP3/BCL10/FBXW11/IL23A/SH2D1B/TRIM15/CLEC4E/SIGLEC11 | 72 |
| BP | GO:0046635 | positive regulation of alpha-beta T cell activation | 19/2077 | 62/18670 | 2.66E-05 | 0.008817 | 0.008319 | ADA/AP3B1/CBFB/CD3E/CD55/CD80/CD83/EBI3/IL12B/IL12RB1/IL4R/PNP/RASAL3/RIPK2/SOCS1/SOCS5/SYK/ZAP70/IL23A | 19 |
| BP | GO:0046632 | alpha-beta T cell differentiation | 26/2077 | 101/18670 | 3.10E-05 | 0.009738 | 0.009187 | PLA2G2D/ADA/AP3B1/CBFB/CD80/CD83/GPR18/IL12B/IL12RB1/IL2/IL4R/IRF1/IRF4/PAX1/PNP/RIPK2/SATB1/SLAMF6/SOCS1/SOCS5/STAT3/SYK/TCF7/ZAP70/ZNF683/IL23A | 26 |
| BP | GO:2000116 | regulation of cysteine-type endopeptidase activity | 48/2077 | 239/18670 | 3.43E-05 | 0.010222 | 0.009644 | RAG1/VIL1/CASP8AP2/AIM2/ANP32B/ARL6IP1/ARRB1/BID/BIRC2/CASP10/CASP8/CASP9/CD27/CLEC7A/COL4A3/CRYAB/CYCS/F3/FASLG/HSPE1/IGBP1/KLF4/LAMP3/MAPT/MICAL1/MMP9/MTCH1/NOD1/PML/PPM1F/PSMB9/RIPK2/RNF34/RPS27L/SIAH2/SNCA/SYK/TFAP2B/TNF/TNFAIP8/TNFRSF10A/XIAP/YWHAE/CASC2/CASP5/WNT9A/BCL10/IFT57 | 48 |
| BP | GO:0045580 | regulation of T cell differentiation | 32/2077 | 139/18670 | 4.59E-05 | 0.01306 | 0.012322 | IFNB1/RAG1/IL4/ADA/ADAM8/AP3B1/BTN2A2/CARD11/CBFB/CD27/CD80/CD83/CYLD/DROSHA/IL12B/IL12RB1/IL2/IL2RA/IL4R/IRF1/IRF4/LAG3/PNP/RIPK2/SOCS1/SOCS5/SYK/TESPA1/ZAP70/ZNF683/IL23A/IFNL1 | 32 |
| BP | GO:0002283 | neutrophil activation involved in immune response | 83/2077 | 488/18670 | 5.17E-05 | 0.013554 | 0.012788 | LILRA3/MCEMP1/CHIT1/OLFM4/RNASE2/ACTR2/ADAM10/ADAM8/ALDOC/ALOX5/ANXA2/ANXA3/B2M/CANT1/CAP1/CD47/CD55/CD58/CDA/CFP/CLEC4C/CLEC5A/CREG1/CTSC/CXCL1/CYFIP1/DIAPH1/DNASE1L1/DNASE1L3/DOK3/FPR1/FRK/GALNS/GLA/GSDMD/HK3/HUWE1/ITGAX/KCNAB2/KPNB1/LAMP2/LAMTOR1/LAMTOR3/LILRB3/LPCAT1/MAN2B1/MMP25/MMP9/MS4A3/NFAM1/OSCAR/PAFAH1B2/PLAC8/PLEKHO2/PNP/PSMB1/PSMC2/PSMD6/PTAFR/RAB14/RAB27A/RAB5B/RAC1/RAP2B/RHOF/RHOG/SELL/STBD1/STK10/SURF4/SVIP/SYK/TCIRG1/TMC6/TMEM63A/TRAPPC1/VAT1/YPEL5/HSP90AA1/SIGLEC5/CAMP/CD177/FRMPD3 | 83 |
| BP | GO:0042098 | T cell proliferation | 39/2077 | 184/18670 | 5.31E-05 | 0.013554 | 0.012788 | IL4/PLA2G2D/BTN2A2/BTN3A1/CARD11/CCDC88B/CD1D/CD274/CD3E/CD40LG/CD55/CD6/CD80/CLEC4G/CLECL1/EBI3/ELF4/FKBP1B/GPNMB/HES1/IDO1/IL10/IL12B/IL12RB1/IL2/IL2RA/IRF1/PNP/PSMB10/RASAL3/RIPK2/RIPK3/SATB1/SYK/TNFRSF4/ZAP70/IL23A/TNFSF18/CLC | 39 |
| BP | GO:0070661 | leukocyte proliferation | 56/2077 | 298/18670 | 5.74E-05 | 0.013554 | 0.012788 | IFNB1/CD38/IFNW1/IL4/PLA2G2D/TREM2/ADA/AZI2/BTN2A2/BTN3A1/CARD11/CCDC88B/CD180/CD1D/CD22/CD274/CD3E/CD40LG/CD55/CD6/CD80/CLEC4G/CLECL1/EBI3/ELF4/FKBP1B/GPNMB/HES1/IDO1/IKZF3/IL10/IL12B/IL12RB1/IL2/IL2RA/IRF1/IRS2/LST1/MZB1/NPR3/PNP/PSMB10/RASAL3/RIPK2/RIPK3/SATB1/SYK/TCIRG1/TNFAIP3/TNFRSF4/ZAP70/IL23A/TNFSF18/CLC/FGF10/PTH | 56 |
| BP | GO:0034612 | response to tumor necrosis factor | 58/2077 | 312/18670 | 5.86E-05 | 0.013554 | 0.012788 | DCSTAMP/ADAM10/AIM2/BIRC2/CASP8/CCL1/CCL16/CCL17/CCL18/CCL22/CCL26/CCL4/CD27/CD40LG/CD58/CDIP1/CHUK/COMMD7/CYLD/DAB2IP/EDA/EDARADD/FOXO3/HIPK1/IGBP1/LTA/MAP2K7/MIR142/NFKBIA/PSMA8/PSMB1/PSMB10/PSMB9/PSMC2/PSMC6/PSMD6/RBCK1/SGMS1/SPHK1/STAT1/SYK/TANK/TAX1BP1/TCL1A/TNF/TNFAIP3/TNFRSF4/TNFRSF9/TRAF1/TRAF3/ZFP36/CCL7/ADAMTS7/PSMA3/CXCL16/HMHB1/MYOD1/TNFSF18 | 58 |
| BP | GO:0046634 | regulation of alpha-beta T cell activation | 24/2077 | 93/18670 | 5.90E-05 | 0.013554 | 0.012788 | ADA/AP3B1/CBFB/CD274/CD3E/CD55/CD80/CD83/EBI3/IL12B/IL12RB1/IL2/IL4R/IRF1/IRF4/PNP/RASAL3/RIPK2/SOCS1/SOCS5/SYK/ZAP70/ZNF683/IL23A | 24 |
| BP | GO:0042119 | neutrophil activation | 84/2077 | 498/18670 | 6.30E-05 | 0.013933 | 0.013146 | LILRA3/MCEMP1/CHIT1/OLFM4/RNASE2/ACTR2/ADAM10/ADAM8/ALDOC/ALOX5/ANXA2/ANXA3/B2M/CANT1/CAP1/CD47/CD55/CD58/CDA/CFP/CLEC4C/CLEC5A/CREG1/CTSC/CXCL1/CYFIP1/DIAPH1/DNASE1L1/DNASE1L3/DOK3/FPR1/FRK/GALNS/GLA/GSDMD/HK3/HUWE1/IL18RAP/ITGAX/KCNAB2/KPNB1/LAMP2/LAMTOR1/LAMTOR3/LILRB3/LPCAT1/MAN2B1/MMP25/MMP9/MS4A3/NFAM1/OSCAR/PAFAH1B2/PLAC8/PLEKHO2/PNP/PSMB1/PSMC2/PSMD6/PTAFR/RAB14/RAB27A/RAB5B/RAC1/RAP2B/RHOF/RHOG/SELL/STBD1/STK10/SURF4/SVIP/SYK/TCIRG1/TMC6/TMEM63A/TRAPPC1/VAT1/YPEL5/HSP90AA1/SIGLEC5/CAMP/CD177/FRMPD3 | 84 |
| BP | GO:0043312 | neutrophil degranulation | 82/2077 | 485/18670 | 7.06E-05 | 0.014618 | 0.013792 | LILRA3/MCEMP1/CHIT1/OLFM4/RNASE2/ACTR2/ADAM10/ADAM8/ALDOC/ALOX5/ANXA2/ANXA3/B2M/CANT1/CAP1/CD47/CD55/CD58/CDA/CFP/CLEC4C/CLEC5A/CREG1/CTSC/CXCL1/CYFIP1/DIAPH1/DNASE1L1/DOK3/FPR1/FRK/GALNS/GLA/GSDMD/HK3/HUWE1/ITGAX/KCNAB2/KPNB1/LAMP2/LAMTOR1/LAMTOR3/LILRB3/LPCAT1/MAN2B1/MMP25/MMP9/MS4A3/NFAM1/OSCAR/PAFAH1B2/PLAC8/PLEKHO2/PNP/PSMB1/PSMC2/PSMD6/PTAFR/RAB14/RAB27A/RAB5B/RAC1/RAP2B/RHOF/RHOG/SELL/STBD1/STK10/SURF4/SVIP/SYK/TCIRG1/TMC6/TMEM63A/TRAPPC1/VAT1/YPEL5/HSP90AA1/SIGLEC5/CAMP/CD177/FRMPD3 | 82 |
| BP | GO:0045621 | positive regulation of lymphocyte differentiation | 24/2077 | 94/18670 | 7.10E-05 | 0.014618 | 0.013792 | RAG1/IL4/ADA/ADAM8/AP3B1/BTN2A2/CBFB/CD27/CD80/CD83/CYLD/IL12B/IL12RB1/IL2/IL2RA/IL4R/PNP/RIPK2/SOCS1/SOCS5/SYK/TESPA1/ZAP70/IL23A | 24 |
| BP | GO:0030217 | T cell differentiation | 47/2077 | 240/18670 | 7.87E-05 | 0.015661 | 0.014775 | IFNB1/RAG1/IL4/PLA2G2D/ADA/ADAM8/AP3B1/B2M/BTN2A2/CARD11/CBFB/CCR7/CD1D/CD27/CD3E/CD80/CD83/CYLD/DROSHA/GPR18/IL12B/IL12RB1/IL2/IL2RA/IL4R/IRF1/IRF4/JMJD6/LAG3/PAX1/PNP/RIPK2/RIPK3/SATB1/SLAMF6/SOCS1/SOCS5/STAT3/SYK/TCF7/TCIRG1/TESPA1/ZAP70/ZNF683/IL23A/CLEC4E/IFNL1 | 47 |
| BP | GO:0046641 | positive regulation of alpha-beta T cell proliferation | 9/2077 | 19/18670 | 8.35E-05 | 0.016075 | 0.015167 | CD3E/CD55/EBI3/IL12B/RASAL3/RIPK2/SYK/ZAP70/IL23A | 9 |
| BP | GO:0050670 | regulation of lymphocyte proliferation | 42/2077 | 208/18670 | 9.06E-05 | 0.016418 | 0.015489 | CD38/IL4/PLA2G2D/ADA/BTN2A2/CARD11/CCDC88B/CD1D/CD22/CD274/CD3E/CD40LG/CD55/CD6/CD80/CLEC4G/CLECL1/EBI3/GPNMB/HES1/IDO1/IKZF3/IL10/IL12B/IL12RB1/IL2/IL2RA/IRF1/IRS2/LST1/MZB1/PNP/RASAL3/RIPK2/RIPK3/SYK/TNFRSF4/ZAP70/IL23A/TNFSF18/CLC/FGF10 | 42 |
| BP | GO:0045619 | regulation of lymphocyte differentiation | 36/2077 | 169/18670 | 9.08E-05 | 0.016418 | 0.015489 | IFNB1/RAG1/IL4/ADA/ADAM8/AP3B1/BTN2A2/CARD11/CBFB/CD27/CD80/CD83/CYLD/DROSHA/IKZF3/IL12B/IL12RB1/IL2/IL2RA/IL4R/IRF1/IRF4/LAG3/NFAM1/PNP/RIPK2/RNF41/SOCS1/SOCS5/SYK/TESPA1/ZAP70/ZNF683/IL23A/PGLYRP2/IFNL1 | 36 |
| BP | GO:0070663 | regulation of leukocyte proliferation | 44/2077 | 222/18670 | 9.82E-05 | 0.017246 | 0.016271 | CD38/IL4/PLA2G2D/ADA/BTN2A2/CARD11/CCDC88B/CD1D/CD22/CD274/CD3E/CD40LG/CD55/CD6/CD80/CLEC4G/CLECL1/EBI3/GPNMB/HES1/IDO1/IKZF3/IL10/IL12B/IL12RB1/IL2/IL2RA/IRF1/IRS2/LST1/MZB1/PNP/RASAL3/RIPK2/RIPK3/SYK/TNFAIP3/TNFRSF4/ZAP70/IL23A/TNFSF18/CLC/FGF10/PTH | 44 |
| BP | GO:0032944 | regulation of mononuclear cell proliferation | 42/2077 | 209/18670 | 0.000101 | 0.017285 | 0.016308 | CD38/IL4/PLA2G2D/ADA/BTN2A2/CARD11/CCDC88B/CD1D/CD22/CD274/CD3E/CD40LG/CD55/CD6/CD80/CLEC4G/CLECL1/EBI3/GPNMB/HES1/IDO1/IKZF3/IL10/IL12B/IL12RB1/IL2/IL2RA/IRF1/IRS2/LST1/MZB1/PNP/RASAL3/RIPK2/RIPK3/SYK/TNFRSF4/ZAP70/IL23A/TNFSF18/CLC/FGF10 | 42 |
| BP | GO:0046638 | positive regulation of alpha-beta T cell differentiation | 15/2077 | 47/18670 | 0.00011 | 0.018263 | 0.017231 | ADA/AP3B1/CBFB/CD80/CD83/IL12B/IL12RB1/IL4R/PNP/RIPK2/SOCS1/SOCS5/SYK/ZAP70/IL23A | 15 |
| BP | GO:0002446 | neutrophil mediated immunity | 83/2077 | 499/18670 | 0.000113 | 0.018263 | 0.017231 | LILRA3/MCEMP1/CHIT1/OLFM4/RNASE2/ACTR2/ADAM10/ADAM8/ALDOC/ALOX5/ANXA2/ANXA3/B2M/CANT1/CAP1/CD47/CD55/CD58/CDA/CFP/CLEC4C/CLEC5A/CREG1/CTSC/CXCL1/CYFIP1/DIAPH1/DNASE1L1/DNASE1L3/DOK3/FPR1/FRK/GALNS/GLA/GSDMD/HK3/HUWE1/ITGAX/KCNAB2/KPNB1/LAMP2/LAMTOR1/LAMTOR3/LILRB3/LPCAT1/MAN2B1/MMP25/MMP9/MS4A3/NFAM1/OSCAR/PAFAH1B2/PLAC8/PLEKHO2/PNP/PSMB1/PSMC2/PSMD6/PTAFR/RAB14/RAB27A/RAB5B/RAC1/RAP2B/RHOF/RHOG/SELL/STBD1/STK10/SURF4/SVIP/SYK/TCIRG1/TMC6/TMEM63A/TRAPPC1/VAT1/YPEL5/HSP90AA1/SIGLEC5/CAMP/CD177/FRMPD3 | 83 |
| BP | GO:0046637 | regulation of alpha-beta T cell differentiation | 18/2077 | 63/18670 | 0.000119 | 0.018337 | 0.0173 | ADA/AP3B1/CBFB/CD80/CD83/IL12B/IL12RB1/IL2/IL4R/IRF4/PNP/RIPK2/SOCS1/SOCS5/SYK/ZAP70/ZNF683/IL23A | 18 |
| BP | GO:0001819 | positive regulation of cytokine production | 78/2077 | 464/18670 | 0.000127 | 0.018337 | 0.0173 | GPSM3/IL4/LBP/PANX3/TREM2/ADAM8/AIM2/AKIRIN2/B2M/BIRC2/C1QBP/CADM1/CARD11/CASP8/CCDC88B/CCL1/CCR7/CD226/CD274/CD3E/CD40LG/CD58/CD6/CD80/CD83/CHUK/CLEC5A/CLEC7A/CRCP/CRLF2/DHX33/DHX58/EBI3/GSDMD/IDO1/IL10/IL12B/IL12RB1/IL17RA/IL17RB/IL1F10/IL1RL1/IL2/IL26/IL27RA/IL37/IL4R/IRF1/IRF4/LTA/MAPK11/MCOLN2/MMP12/MYD88/NFAM1/NLRP7/NOD1/NR4A3/PIBF1/POLR2E/POLR2K/PTAFR/RIPK2/SLAMF6/SPHK1/STAT1/STAT3/SYK/TIGIT/TNF/PAEP/BCL10/HMHB1/IL23A/TRIM15/AGT/CLEC4E/IFNL1 | 78 |
| BP | GO:0046651 | lymphocyte proliferation | 51/2077 | 272/18670 | 0.000128 | 0.018337 | 0.0173 | IFNB1/CD38/IFNW1/IL4/PLA2G2D/ADA/AZI2/BTN2A2/BTN3A1/CARD11/CCDC88B/CD180/CD1D/CD22/CD274/CD3E/CD40LG/CD55/CD6/CD80/CLEC4G/CLECL1/EBI3/ELF4/FKBP1B/GPNMB/HES1/IDO1/IKZF3/IL10/IL12B/IL12RB1/IL2/IL2RA/IRF1/IRS2/LST1/MZB1/PNP/PSMB10/RASAL3/RIPK2/RIPK3/SATB1/SYK/TNFRSF4/ZAP70/IL23A/TNFSF18/CLC/FGF10 | 51 |
| BP | GO:0046633 | alpha-beta T cell proliferation | 12/2077 | 33/18670 | 0.000131 | 0.018337 | 0.0173 | CD274/CD3E/CD55/EBI3/ELF4/IL12B/IRF1/RASAL3/RIPK2/SYK/ZAP70/IL23A | 12 |
| BP | GO:0019058 | viral life cycle | 59/2077 | 328/18670 | 0.000131 | 0.018337 | 0.0173 | CLDN6/IFNB1/AAAS/ADAR/ADARB1/ANXA2/APOE/BANF1/CD55/CD80/CHMP1B/CHMP2B/CLEC4G/CLEC5A/CXCR6/DAG1/DDB1/EEA1/FAM111A/FCN3/GPR15/HTATSF1/IFI27/ISG15/ISG20/ITGA2/ITGB7/KPNA2/KPNB1/LAMP3/LARP1/NUP107/NUP155/NUP62/P4HB/PABPC1/PCBP2/PI4KA/PML/RAB43/RANBP2/RNASEL/SRPK2/TNF/TNFRSF4/TRIM21/TRIM27/UBB/VAPB/VPS18/VPS4B/WWP2/ZC3HAV1/APOBEC3D/AICDA/APCS/HAVCR1/TRIM15/CLEC4M | 59 |
| BP | GO:1903708 | positive regulation of hemopoiesis | 38/2077 | 185/18670 | 0.000132 | 0.018337 | 0.0173 | DCSTAMP/RAG1/IL4/TREM2/ADA/ADAM8/AP3B1/BTN2A2/CASP8/CBFB/CD101/CD27/CD80/CD83/CYLD/FAM210B/FES/FOXO3/IL12B/IL12RB1/IL2/IL2RA/IL4R/ISG15/NUDT21/PNP/RIPK2/SOCS1/SOCS5/STAT1/STAT3/STAT5B/SYK/TESPA1/TNF/ZAP70/ZBTB46/IL23A | 38 |
| BP | GO:0032943 | mononuclear cell proliferation | 51/2077 | 274/18670 | 0.000154 | 0.020531 | 0.019371 | IFNB1/CD38/IFNW1/IL4/PLA2G2D/ADA/AZI2/BTN2A2/BTN3A1/CARD11/CCDC88B/CD180/CD1D/CD22/CD274/CD3E/CD40LG/CD55/CD6/CD80/CLEC4G/CLECL1/EBI3/ELF4/FKBP1B/GPNMB/HES1/IDO1/IKZF3/IL10/IL12B/IL12RB1/IL2/IL2RA/IRF1/IRS2/LST1/MZB1/PNP/PSMB10/RASAL3/RIPK2/RIPK3/SATB1/SYK/TNFRSF4/ZAP70/IL23A/TNFSF18/CLC/FGF10 | 51 |
| BP | GO:0002696 | positive regulation of leukocyte activation | 66/2077 | 380/18670 | 0.000158 | 0.020531 | 0.019371 | RAG1/CD38/IL4/IGLL5/LBP/TREM2/ADA/ADAM8/AP3B1/BTN2A2/CARD11/CBFB/CCDC88B/CCR7/CD1D/CD226/CD27/CD274/CD3E/CD40LG/CD47/CD5/CD55/CD6/CD80/CD83/CLEC7A/CLECL1/CRLF2/CTSC/CYLD/EBI3/GRB2/HES1/IL10/IL12B/IL12RB1/IL1RL1/IL2/IL2RA/IL4R/IRS2/MIR142/MSH2/NR4A3/PAK1/PNP/PTAFR/RAC1/RASAL3/RIPK2/SIRPG/SOCS1/SOCS5/SPHK2/SYK/TESPA1/TNFRSF4/TNIP2/TP53BP1/YES1/ZAP70/BCL10/CD177/IL23A/FGF10 | 66 |
| BP | GO:0033209 | tumor necrosis factor-mediated signaling pathway | 35/2077 | 167/18670 | 0.000158 | 0.020531 | 0.019371 | AIM2/BIRC2/CASP8/CD27/CD40LG/CDIP1/CHUK/COMMD7/CYLD/EDA/EDARADD/FOXO3/HIPK1/LTA/NFKBIA/PSMA8/PSMB1/PSMB10/PSMB9/PSMC2/PSMC6/PSMD6/RBCK1/SPHK1/STAT1/SYK/TAX1BP1/TNF/TNFAIP3/TNFRSF4/TNFRSF9/TRAF1/TRAF3/PSMA3/TNFSF18 | 35 |
| BP | GO:0000209 | protein polyubiquitination | 56/2077 | 310/18670 | 0.000171 | 0.021749 | 0.02052 | FBXO30/IRF2BP1/FBXL22/AMFR/ANAPC10/BIRC2/CBFB/CBL/CUL1/CUL3/FBXL4/FBXO31/FBXW2/FBXW4/HDAC6/HERC6/HUWE1/IFI27/KLHL42/MKRN1/NEDD4/NFE2L1/PLAA/PSMA8/PSMB1/PSMB10/PSMB9/PSMC2/PSMC6/PSMD6/RBCK1/RNF213/RNF34/RNF41/RNF6/SIAH2/SKP1/TNFAIP3/TRIM21/TRIM27/UBB/UBE2B/UBE2E1/UBE2R2/UBE2V2/UBE2W/UBE3A/UBE4A/UBR5/WWP2/XIAP/FBXO15/MAGEL2/PSMA3/FBXW11/SPSB4 | 56 |
| BP | GO:0030098 | lymphocyte differentiation | 62/2077 | 353/18670 | 0.000179 | 0.02228 | 0.02102 | IFNB1/RAG1/IFNW1/IL4/PLA2G2D/ADA/ADAM8/AP3B1/B2M/BTN2A2/CARD11/CBFB/CCR7/CD1D/CD27/CD3E/CD40LG/CD80/CD83/CYLD/DCLRE1C/DROSHA/GON4L/GPR18/IKZF3/IL10/IL12B/IL12RB1/IL2/IL2RA/IL4R/IRF1/IRF4/JMJD6/LAG3/LYL1/MSH2/NFAM1/NOTCH2/PAX1/PNP/POLM/RIPK2/RIPK3/RNF41/SATB1/SLAMF6/SOCS1/SOCS5/STAT3/SYK/TCF7/TCIRG1/TESPA1/ZAP70/ZNF683/AICDA/IL23A/LRRC8A/PGLYRP2/CLEC4E/IFNL1 | 62 |
| BP | GO:1990266 | neutrophil migration | 27/2077 | 118/18670 | 0.000194 | 0.023646 | 0.022309 | LBP/ADAM8/C1QBP/CCL1/CCL16/CCL17/CCL18/CCL22/CCL26/CCL4/CCR7/CXCL1/CXCL10/CXCL13/CXCL2/CXCL3/CXCL9/IL1F10/IL37/MCOLN2/RAC1/SYK/XG/CCL7/CD177/IL23A/UMOD | 27 |
| BP | GO:0042129 | regulation of T cell proliferation | 33/2077 | 156/18670 | 0.0002 | 0.023907 | 0.022556 | IL4/PLA2G2D/BTN2A2/CARD11/CCDC88B/CD1D/CD274/CD3E/CD40LG/CD55/CD6/CD80/CLEC4G/CLECL1/EBI3/GPNMB/HES1/IDO1/IL10/IL12B/IL12RB1/IL2/IL2RA/IRF1/PNP/RASAL3/RIPK2/RIPK3/SYK/ZAP70/IL23A/TNFSF18/CLC | 33 |
| BP | GO:0071356 | cellular response to tumor necrosis factor | 53/2077 | 291/18670 | 0.000204 | 0.023914 | 0.022562 | DCSTAMP/AIM2/BIRC2/CASP8/CCL1/CCL16/CCL17/CCL18/CCL22/CCL26/CCL4/CD27/CD40LG/CD58/CDIP1/CHUK/COMMD7/CYLD/DAB2IP/EDA/EDARADD/FOXO3/HIPK1/LTA/NFKBIA/PSMA8/PSMB1/PSMB10/PSMB9/PSMC2/PSMC6/PSMD6/RBCK1/SGMS1/SPHK1/STAT1/SYK/TANK/TAX1BP1/TCL1A/TNF/TNFAIP3/TNFRSF4/TNFRSF9/TRAF1/TRAF3/ZFP36/CCL7/ADAMTS7/PSMA3/HMHB1/MYOD1/TNFSF18 | 53 |
| BP | GO:1902107 | positive regulation of leukocyte differentiation | 31/2077 | 144/18670 | 0.000222 | 0.025099 | 0.02368 | DCSTAMP/RAG1/IL4/TREM2/ADA/ADAM8/AP3B1/BTN2A2/CASP8/CBFB/CD101/CD27/CD80/CD83/CYLD/FES/IL12B/IL12RB1/IL2/IL2RA/IL4R/PNP/RIPK2/SOCS1/SOCS5/SYK/TESPA1/TNF/ZAP70/ZBTB46/IL23A | 31 |
| BP | GO:0046640 | regulation of alpha-beta T cell proliferation | 11/2077 | 30/18670 | 0.000229 | 0.025099 | 0.02368 | CD274/CD3E/CD55/EBI3/IL12B/IRF1/RASAL3/RIPK2/SYK/ZAP70/IL23A | 11 |
| BP | GO:0097306 | cellular response to alcohol | 22/2077 | 89/18670 | 0.000232 | 0.025099 | 0.02368 | NPAS4/BLM/DAG1/DNMT3A/EFNA5/FDX1/FOXO3/GNAI1/GRAMD1A/GRAMD1B/KLF4/LARP1/LRP8/NFE2L1/OSBPL7/P2RY6/PTCH1/SPHK2/CCL7/ADCY5/CFTR/GLRA2 | 22 |
| BP | GO:0042102 | positive regulation of T cell proliferation | 23/2077 | 95/18670 | 0.000235 | 0.025099 | 0.02368 | IL4/CARD11/CCDC88B/CD1D/CD274/CD3E/CD40LG/CD55/CD6/CD80/CLECL1/EBI3/HES1/IL12B/IL12RB1/IL2/IL2RA/PNP/RASAL3/RIPK2/SYK/ZAP70/IL23A | 23 |
| BP | GO:0032649 | regulation of interferon-gamma production | 24/2077 | 101/18670 | 0.000235 | 0.025099 | 0.02368 | C1QBP/CCR7/CD226/CD274/CD3E/CD47/CD96/CLEC7A/EBI3/IL10/IL12B/IL12RB1/IL1RL1/IL2/IL27RA/ISG15/LTA/RIPK2/RIPK3/SLAMF6/TNF/HMHB1/IL23A/IFNL1 | 24 |
| BP | GO:0051954 | positive regulation of amine transport | 12/2077 | 35/18670 | 0.000249 | 0.026118 | 0.024642 | GDNF/TACR2/ARL6IP1/CARTPT/KMO/RAB3B/RAB3GAP1/DRD4/SLC38A3/SLC6A1/AGT/STX1A | 12 |
| BP | GO:1903706 | regulation of hemopoiesis | 78/2077 | 475/18670 | 0.000271 | 0.027871 | 0.026296 | DCSTAMP/IFNB1/RAG1/IL4/TREM2/ADA/ADAM8/AGO3/AP3B1/B2M/BTN2A2/CARD11/CARTPT/CASP8/CBFB/CD101/CD27/CD80/CD83/CDC73/CYLD/DPY30/DROSHA/FAM210B/FES/FOXO3/GP1BA/GPR55/HDAC1/HES1/IKZF3/IL12B/IL12RB1/IL2/IL2RA/IL4R/IRF1/IRF4/ISG15/KLF13/LAG3/LILRB3/NFAM1/NFKBIA/NOTCH2/NR4A3/NUDT21/PAF1/PNP/PRMT6/PSMA8/PSMB1/PSMB10/PSMB9/PSMC2/PSMC6/PSMD6/RIPK2/RNF41/SOCS1/SOCS5/STAT1/STAT3/STAT5B/SYK/TESPA1/TNF/YTHDF2/ZAP70/ZBTB46/ZFP36/ZNF683/FSHB/APCS/PSMA3/IL23A/PGLYRP2/IFNL1 | 78 |
| BP | GO:0052548 | regulation of endopeptidase activity | 71/2077 | 425/18670 | 0.000301 | 0.030008 | 0.028312 | CST9/LPA/RAG1/USP14/VIL1/WFIKKN1/CASP8AP2/SERPINB11/AIM2/AKIRIN2/ANP32B/ARL6IP1/ARRB1/BID/BIRC2/CASP10/CASP8/CASP9/CD27/CLEC7A/COL4A3/CRYAB/CYCS/F3/FASLG/HDAC1/HSPE1/IGBP1/ITIH4/KLF4/LAMP3/MAPT/MICAL1/MMP9/MTCH1/NLRP7/NOD1/PEBP1/PML/PPM1F/PSMB9/RIPK2/RNF34/RPS27L/SIAH2/SNCA/SPINK1/SPINK7/STAT3/SYK/TFAP2B/TNF/TNFAIP8/TNFRSF10A/UBE2Z/XIAP/YWHAE/CASC2/CASP5/FETUB/SERPIND1/CST2/PSMA3/WNT9A/BCL10/CST11/IFT57/SPINK6/AGT/KNG1/SERPINI2 | 71 |
| BP | GO:0034341 | response to interferon-gamma | 39/2077 | 199/18670 | 0.000302 | 0.030008 | 0.028312 | ACTR2/B2M/CCL1/CCL16/CCL17/CCL18/CCL22/CCL26/CCL4/CD47/CD58/CIITA/EVL/IFNGR2/IL12B/IL12RB1/IRF1/IRF4/IRF9/IRGM/JAK1/KYNU/NLRC5/PARP14/PARP9/PML/PTAFR/RAB43/SLC26A6/SNCA/SOCS1/SOCS3/STAT1/STX8/TRIM21/WAS/CAMK2A/CCL7/CXCL16 | 39 |
| BP | GO:0050663 | cytokine secretion | 45/2077 | 240/18670 | 0.000308 | 0.030178 | 0.028472 | PANX3/AIM2/BTN2A2/BTN3A1/CADM1/CARD11/CCL1/CCR7/CD200R1/CD274/CD58/CHUK/CLEC5A/CLECL1/CRLF2/GSDMD/IL10/IL17RA/IL17RB/IL1RL1/IL26/IL27RA/IL4R/ISG15/LGR4/MAPK11/MCOLN2/MMP12/NLRP7/PML/PNP/PPP1R11/RIPK2/SOCS1/SPHK2/SYK/TCIRG1/TNF/TNFAIP3/TNFRSF4/TRIM27/PAEP/HMHB1/AGT/CLEC4E | 45 |
| BP | GO:0043687 | post-translational protein modification | 62/2077 | 361/18670 | 0.000335 | 0.031935 | 0.03013 | AGBL1/ENAM/FBXO30/ASB2/ASB5/EVA1A/FBXL22/SPP1/ADAM10/APOE/APOL1/ASB13/CISH/COPS3/COPS5/CUL1/CUL2/CUL3/DCAF10/DCAF16/DDB1/FBXL4/FBXO31/FBXW2/FBXW4/FEM1B/FEM1C/IRGM/KBTBD8/KLHL22/KLHL42/LRRC41/NAE1/NEURL2/OBSL1/P4HB/PRKCSH/PROC/PSMA8/PSMB1/PSMB10/PSMB9/PSMC2/PSMC6/PSMD6/RAB11A/RAB13/RABGGTB/SKP1/SOCS3/SOCS5/SOCS6/TTL/SERPIND1/FBXO15/MEPE/PSMA3/FBXW11/KLHL11/SPSB4/CDH2/KNG1 | 62 |
| BP | GO:0071346 | cellular response to interferon-gamma | 36/2077 | 180/18670 | 0.000337 | 0.031935 | 0.03013 | ACTR2/B2M/CCL1/CCL16/CCL17/CCL18/CCL22/CCL26/CCL4/CD47/CD58/CIITA/EVL/IFNGR2/IL12B/IL12RB1/IRF1/IRF4/IRF9/IRGM/JAK1/NLRC5/PARP14/PARP9/PML/PTAFR/RAB43/SLC26A6/SOCS1/SOCS3/STAT1/STX8/TRIM21/WAS/CAMK2A/CCL7 | 36 |
| BP | GO:0097530 | granulocyte migration | 30/2077 | 141/18670 | 0.000344 | 0.032056 | 0.030244 | LBP/MSTN/ADAM8/C1QBP/CCL1/CCL16/CCL17/CCL18/CCL22/CCL26/CCL4/CCR7/CXCL1/CXCL10/CXCL13/CXCL2/CXCL3/CXCL9/HRH1/IL17RA/IL1F10/IL37/MCOLN2/RAC1/SYK/XG/CCL7/CD177/IL23A/UMOD | 30 |
| BP | GO:0002833 | positive regulation of response to biotic stimulus | 46/2077 | 249/18670 | 0.000375 | 0.033969 | 0.032048 | IFNB1/LBP/ADAM8/AIM2/CADM1/CARD11/CD180/CD1D/CD226/CD274/CHUK/CLEC4C/CUL1/DHX58/IL12B/IL18RAP/IRGM/KRAS/LAG3/MMP12/NCR3/NLRC5/NOD1/PAK1/PARP9/PSMA8/PSMB1/PSMB10/PSMB9/PSMC2/PSMC6/PSMD6/RIPK2/SH2D1A/SKP1/SLAMF6/SYK/MUC2/MUC5AC/PSMA3/ULBP3/BCL10/FBXW11/SH2D1B/TRIM15/CLEC4E | 46 |
| BP | GO:0006919 | activation of cysteine-type endopeptidase activity involved in apoptotic process | 21/2077 | 86/18670 | 0.000381 | 0.033969 | 0.032048 | CASP8AP2/ANP32B/BID/CASP10/CASP8/CASP9/COL4A3/CYCS/F3/FASLG/HSPE1/MAPT/MTCH1/NOD1/PML/RPS27L/SNCA/TNF/TNFRSF10A/CASP5/IFT57 | 21 |
| BP | GO:0050792 | regulation of viral process | 40/2077 | 208/18670 | 0.000381 | 0.033969 | 0.032048 | IFNB1/ADAR/ADARB1/ANXA2/APOE/BANF1/CCL4/CHMP2B/DDB1/FAM111A/FCN3/GTF2F1/GTF2F2/HDAC1/IFI27/ISG15/ISG20/KPNA2/LAMP3/LARP1/P4HB/PABPC1/PML/POLR2E/POLR2G/POLR2K/RNASEL/SRPK2/STAT1/TNF/TRIM21/TRIM27/VAPB/VPS4B/ZC3HAV1/ZFP36/APOBEC3D/AICDA/APCS/TRIM15 | 40 |
| BP | GO:0098810 | neurotransmitter reuptake | 10/2077 | 27/18670 | 0.000401 | 0.035222 | 0.033231 | GDNF/SLC1A7/PER2/RAB3B/SLC1A2/SNCA/TOR1A/DRD4/SLC18A1/SLC6A1 | 10 |
| BP | GO:0072676 | lymphocyte migration | 25/2077 | 111/18670 | 0.000425 | 0.036758 | 0.03468 | ADAM10/ADAM8/CCL1/CCL16/CCL17/CCL18/CCL22/CCL26/CCL4/CCR7/CD200R1/CXCL10/CXCL13/CXCR3/CYP7B1/GCSAM/GPR15/IL27RA/ITGB7/RIPK3/STK10/XG/ZAP70/CCL7/CXCL16 | 25 |
| BP | GO:0050671 | positive regulation of lymphocyte proliferation | 28/2077 | 130/18670 | 0.000433 | 0.036895 | 0.03481 | CD38/IL4/ADA/CARD11/CCDC88B/CD1D/CD274/CD3E/CD40LG/CD55/CD6/CD80/CLECL1/EBI3/HES1/IL12B/IL12RB1/IL2/IL2RA/IRS2/PNP/RASAL3/RIPK2/SYK/TNFRSF4/ZAP70/IL23A/FGF10 | 28 |
| BP | GO:0050867 | positive regulation of cell activation | 66/2077 | 394/18670 | 0.000447 | 0.037375 | 0.035262 | RAG1/CD38/IL4/IGLL5/LBP/TREM2/ADA/ADAM8/AP3B1/BTN2A2/CARD11/CBFB/CCDC88B/CCR7/CD1D/CD226/CD27/CD274/CD3E/CD40LG/CD47/CD5/CD55/CD6/CD80/CD83/CLEC7A/CLECL1/CRLF2/CTSC/CYLD/EBI3/GRB2/HES1/IL10/IL12B/IL12RB1/IL1RL1/IL2/IL2RA/IL4R/IRS2/MIR142/MSH2/NR4A3/PAK1/PNP/PTAFR/RAC1/RASAL3/RIPK2/SIRPG/SOCS1/SOCS5/SPHK2/SYK/TESPA1/TNFRSF4/TNIP2/TP53BP1/YES1/ZAP70/BCL10/CD177/IL23A/FGF10 | 66 |
| BP | GO:1902105 | regulation of leukocyte differentiation | 49/2077 | 272/18670 | 0.000451 | 0.037375 | 0.035262 | DCSTAMP/IFNB1/RAG1/IL4/TREM2/ADA/ADAM8/AP3B1/BTN2A2/CARD11/CARTPT/CASP8/CBFB/CD101/CD27/CD80/CD83/CYLD/DROSHA/FES/GPR55/IKZF3/IL12B/IL12RB1/IL2/IL2RA/IL4R/IRF1/IRF4/LAG3/LILRB3/NFAM1/NOTCH2/PNP/RIPK2/RNF41/SOCS1/SOCS5/SYK/TESPA1/TNF/ZAP70/ZBTB46/ZNF683/FSHB/APCS/IL23A/PGLYRP2/IFNL1 | 49 |
| BP | GO:0032946 | positive regulation of mononuclear cell proliferation | 28/2077 | 131/18670 | 0.000493 | 0.039964 | 0.037705 | CD38/IL4/ADA/CARD11/CCDC88B/CD1D/CD274/CD3E/CD40LG/CD55/CD6/CD80/CLECL1/EBI3/HES1/IL12B/IL12RB1/IL2/IL2RA/IRS2/PNP/RASAL3/RIPK2/SYK/TNFRSF4/ZAP70/IL23A/FGF10 | 28 |
| BP | GO:0009615 | response to virus | 56/2077 | 323/18670 | 0.000499 | 0.039964 | 0.037705 | IFNB1/SLFN13/IFNW1/RNASE2/ADAR/ADARB1/AIM2/AIMP1/ARF1/BANF1/BIRC2/C1QBP/CCDC130/CCL22/CCL4/CHUK/CRCP/CXCL10/CXCL9/DHX58/FAM111A/FCN3/GTF2F1/IFI27/IFNGR2/IL12B/IL12RB1/IL2RA/IRF1/IRF9/IRGM/ISG15/ISG20/MAPK11/MMP12/NLRC5/PARP9/PCBP2/PIM2/PML/RNASEL/RTP4/STAT1/STAT2/STMN1/TNF/TNFAIP3/TRAF3/URI1/VWCE/ZC3HAV1/APOBEC3D/AICDA/IL23A/TRIM15/IFNL1 | 56 |
| BP | GO:0045785 | positive regulation of cell adhesion | 67/2077 | 403/18670 | 0.000502 | 0.039964 | 0.037705 | RAG1/IL4/OLFM4/ADA/ADAM19/ADAM8/ALOX15/AP3B1/BTN2A2/C1QBP/CALR/CARD11/CBFB/CCDC88B/CCL28/CCR7/CD1D/CD27/CD274/CD3E/CD40LG/CD47/CD5/CD55/CD6/CD80/CD83/CITED2/CLECL1/CXCL13/CYLD/DAG1/EBI3/EMID1/EMP2/GRB2/HES1/IFT74/IL10/IL12B/IL12RB1/IL2/IL2RA/IL4R/ITGA2/NR4A3/PAK1/PIEZO1/PNP/PPM1F/PTAFR/RAC1/RASAL3/RIPK2/SIRPG/SOCS1/SOCS5/SYK/TESPA1/TGM2/TNF/UTRN/YES1/ZAP70/BCL10/IL23A/TNFSF18 | 67 |
| BP | GO:0070106 | interleukin-27-mediated signaling pathway | 6/2077 | 11/18670 | 0.000529 | 0.041559 | 0.03921 | EBI3/IL27RA/JAK1/STAT1/STAT3/TYK2 | 6 |
| BP | GO:0002703 | regulation of leukocyte mediated immunity | 39/2077 | 205/18670 | 0.000559 | 0.043317 | 0.040868 | IFNB1/STX7/IL4/B2M/C12orf4/CADM1/CD1B/CD1D/CD226/CD96/CLEC4G/DNASE1L3/FES/IL10/IL12B/IL12RB1/IL13RA2/IL18RAP/IL2/IL27RA/IL4R/LAG3/LTA/MSH2/NCR3/PTAFR/RIPK3/SH2D1A/SLAMF6/SPHK2/SYK/TNF/TP53BP1/WAS/ULBP3/CD177/IL23A/SH2D1B/CLC | 39 |
| BP | GO:0002699 | positive regulation of immune effector process | 41/2077 | 219/18670 | 0.000575 | 0.043999 | 0.041512 | STX7/IL4/LBP/APPL2/B2M/C12orf4/CADM1/CD1B/CD1D/CD226/CD80/DHX58/FES/IL12B/IL12RB1/IL13RA2/IL18RAP/IL2/IL4R/LAG3/LTA/MSH2/MZB1/NCR3/NR4A3/PTAFR/RIPK2/SH2D1A/SLAMF6/SOCS5/SPHK2/SYK/TNF/TNFRSF4/TP53BP1/ULBP3/BCL10/CD177/IL23A/SH2D1B/TRIM15 | 41 |
| BP | GO:0097305 | response to alcohol | 43/2077 | 233/18670 | 0.000585 | 0.044173 | 0.041676 | CSN1S1/MSTN/NPAS4/ACTR2/BIRC2/BLM/CASP8/CBL/CCR7/CD27/DAG1/DNMT3A/EFNA5/FDX1/FGFR2/FOXO3/GNAI1/GRAMD1A/GRAMD1B/HPGD/IL2/KLF4/LARP1/LRP8/NFE2L1/OSBPL7/OXCT1/P2RY6/PEMT/PTCH1/RGS19/RGS2/SETD7/SPHK2/STAT3/CCL7/ADCY5/CFTR/DRD4/GLRA2/HSD3B1/HSD3B2/PTH | 43 |
| BP | GO:0032655 | regulation of interleukin-12 production | 15/2077 | 54/18670 | 0.000599 | 0.044223 | 0.041723 | C1QBP/CCR7/CD40LG/CD47/CLEC7A/IDO1/IL10/IL12B/IRF1/MAPK11/PIBF1/RIPK2/SYK/TIGIT/IL23A | 15 |
| BP | GO:0070665 | positive regulation of leukocyte proliferation | 29/2077 | 139/18670 | 0.0006 | 0.044223 | 0.041723 | CD38/IL4/ADA/CARD11/CCDC88B/CD1D/CD274/CD3E/CD40LG/CD55/CD6/CD80/CLECL1/EBI3/HES1/IL12B/IL12RB1/IL2/IL2RA/IRS2/PNP/RASAL3/RIPK2/SYK/TNFRSF4/ZAP70/IL23A/FGF10/PTH | 29 |
| BP | GO:0050729 | positive regulation of inflammatory response | 31/2077 | 153/18670 | 0.00067 | 0.048769 | 0.046012 | GPSM3/LBP/TREM2/ABCC1/ADAM8/CCL1/CCL18/CCR7/CD47/CD6/CLEC7A/CTSC/IDO1/IL12B/IL17RA/IL17RB/IL1RL1/IL2/ITGA2/KLKB1/LTA/MIR142/MYD88/NFKBIA/OSMR/SNCA/SUCNR1/TGM2/TNF/IL23A/AGT | 31 |
| BP | GO:0052547 | regulation of peptidase activity | 73/2077 | 452/18670 | 0.00068 | 0.048896 | 0.046132 | CST9/LPA/RAG1/USP14/VIL1/WFIKKN1/CASP8AP2/SERPINB11/AIM2/AKIRIN2/ANP32B/ARL6IP1/ARRB1/BID/BIRC2/CASP10/CASP8/CASP9/CD27/CLEC7A/COL4A3/CRYAB/CYCS/F3/FASLG/HDAC1/HSPE1/IGBP1/ITIH4/KLF4/LAMP3/MAPK12/MAPT/MICAL1/MMP9/MTCH1/NLRP7/NOD1/PEBP1/PML/PPM1F/PSMB9/RIPK2/RNF34/RPS27L/SIAH2/SNCA/SPINK1/SPINK7/STAT3/SYK/TANK/TFAP2B/TNF/TNFAIP8/TNFRSF10A/UBE2Z/XIAP/YWHAE/CASC2/CASP5/FETUB/SERPIND1/CST2/PSMA3/WNT9A/BCL10/CST11/IFT57/SPINK6/AGT/KNG1/SERPINI2 | 73 |
| BP | GO:0045089 | positive regulation of innate immune response | 40/2077 | 214/18670 | 0.000688 | 0.04891 | 0.046145 | IFNB1/LBP/ADAM8/AIM2/CADM1/CARD11/CD1D/CD226/CHUK/CLEC4C/CUL1/IL12B/IL18RAP/IRGM/KRAS/LAG3/MMP12/NCR3/NLRC5/PAK1/PARP9/PSMA8/PSMB1/PSMB10/PSMB9/PSMC2/PSMC6/PSMD6/SH2D1A/SKP1/SLAMF6/SYK/MUC2/MUC5AC/PSMA3/ULBP3/BCL10/FBXW11/SH2D1B/CLEC4E | 40 |
| BP | GO:0002819 | regulation of adaptive immune response | 32/2077 | 160/18670 | 0.0007 | 0.049156 | 0.046378 | IFNB1/STX7/IL4/ADA/ALOX15/B2M/CD1B/CD1D/CD226/CD274/CD80/CLEC4G/IL10/IL12B/IL12RB1/IL1RL1/IL2/IL27RA/IL4R/IRF1/LTA/MSH2/RIPK2/RIPK3/SOCS5/TNF/TNFAIP3/TP53BP1/TRIM27/WAS/IL23A/CLC | 32 |
| CC | GO:0070820 | tertiary granule | 44/2147 | 164/19717 | 9.49E-09 | 6.81E-06 | 6.56E-06 | STX7/LILRA3/MCEMP1/CHIT1/OLFM4/ADAM10/ADAM8/ALDOC/B2M/CANT1/CD47/CD55/CD58/CDA/CFP/CLEC4C/CLEC5A/CXCL1/CYFIP1/DIAPH1/DOK3/FPR1/GSDMD/ITGAX/KCNAB2/LAMP2/LAMTOR1/LAMTOR3/MMP9/OSCAR/PTAFR/RAB14/RAC1/RAP2B/STBD1/SVIP/TCIRG1/TMC6/TMEM63A/YPEL5/SIGLEC5/CAMP/CD177/FRMPD3 | 44 |
| CC | GO:0070821 | tertiary granule membrane | 20/2147 | 73/19717 | 7.22E-05 | 0.025899 | 0.024943 | LILRA3/MCEMP1/ADAM10/ADAM8/CD47/CLEC4C/CLEC5A/ITGAX/KCNAB2/LAMTOR3/PTAFR/RAB14/RAP2B/STBD1/SVIP/TMC6/TMEM63A/SIGLEC5/CD177/FRMPD3 | 20 |
| MF | GO:0005126 | cytokine receptor binding | 63/2059 | 286/17696 | 3.66E-07 | 0.000393 | 0.000385 | IFNB1/IFNW1/IL4/CASP8AP2/MSTN/BID/BMP2/BMP8B/CASP8/CCL1/CCL16/CCL17/CCL18/CCL22/CCL26/CCL28/CCL4/CCRL2/CD2AP/CD300LF/CD40LG/CXCL1/CXCL10/CXCL13/CXCL2/CXCL3/CXCL9/DAB2IP/EBI3/EDA/EFNA5/FASLG/FEM1B/GDF15/GRB2/IL10/IL12B/IL12RB1/IL1F10/IL2/IL22/IL37/JAK1/LTA/MYD88/PGF/PIBF1/RNF41/STAT1/STAT3/SYK/TNF/TRAF1/TRAF3/TYK2/VEGFB/CCL7/IL25/CXCL16/IL23A/TNFSF18/IFNL1/INHBE | 63 |
| MF | GO:0005125 | cytokine activity | 50/2059 | 220/17696 | 2.21E-06 | 0.001188 | 0.001163 | IFNB1/VSTM1/IFNW1/IL4/MSTN/SPP1/AIMP1/BMP1/BMP2/BMP8B/CCL1/CCL16/CCL17/CCL18/CCL22/CCL26/CCL28/CCL4/CD40LG/CMTM1/CMTM5/CXCL1/CXCL10/CXCL13/CXCL2/CXCL3/CXCL9/EBI3/FASLG/GDF15/IL10/IL12B/IL1F10/IL2/IL22/IL24/IL26/IL37/LTA/TNF/WNT2/CCL7/IL25/CMTM2/CXCL16/IL19/IL23A/TNFSF18/IFNL1/INHBE | 50 |
| MF | GO:0004896 | cytokine receptor activity | 26/2059 | 96/17696 | 2.59E-05 | 0.006807 | 0.006665 | EPOR/CCR7/CCRL2/CRLF2/CSF2RA/CXCR3/CXCR6/EBI3/F3/IFNGR2/IL12B/IL12RB1/IL13RA2/IL17RA/IL17RB/IL18RAP/IL1RL1/IL21R/IL27RA/IL2RA/IL2RG/IL31RA/IL4R/OSMR/ACKR2/GFRA4 | 26 |
| MF | GO:0030546 | signaling receptor activator activity | 87/2059 | 487/17696 | 2.77E-05 | 0.006807 | 0.006665 | FGF5/GDNF/IFNB1/NPPB/PYY/RLN2/SCT/VSTM1/IFNW1/IL4/INSL3/UTS2/MSTN/SPP1/AIMP1/BMP1/BMP2/BMP8B/BTC/CARTPT/CCL1/CCL16/CCL17/CCL18/CCL22/CCL26/CCL28/CCL4/CD40LG/CLEC11A/CMTM1/CMTM5/CXCL1/CXCL10/CXCL13/CXCL2/CXCL3/CXCL9/EBI3/EFNA5/FASLG/GDF15/GPNMB/IL10/IL12B/IL1F10/IL2/IL22/IL24/IL26/IL37/LTA/MAPT/NPFF/NRG2/PGF/PMCH/SEMA4C/SEMA4F/TNF/TYMP/VEGFB/WNT2/CCL7/FSHB/GPHA2/IL25/PDYN/POMC/ANGPT4/CMTM2/FGF12/HCRT/INSL5/WNT9A/ADM2/CXCL16/HBEGF/IL19/IL23A/SEMA3B/TNFSF18/AGT/FGF10/IFNL1/INHBE/PTH | 87 |
| MF | GO:0048018 | receptor ligand activity | 86/2059 | 482/17696 | 3.22E-05 | 0.006807 | 0.006665 | FGF5/GDNF/IFNB1/NPPB/PYY/RLN2/SCT/VSTM1/IFNW1/IL4/INSL3/UTS2/MSTN/SPP1/AIMP1/BMP1/BMP2/BMP8B/BTC/CARTPT/CCL1/CCL16/CCL17/CCL18/CCL22/CCL26/CCL28/CCL4/CD40LG/CLEC11A/CMTM1/CMTM5/CXCL1/CXCL10/CXCL13/CXCL2/CXCL3/CXCL9/EBI3/EFNA5/FASLG/GDF15/GPNMB/IL10/IL12B/IL1F10/IL2/IL22/IL24/IL26/IL37/LTA/MAPT/NPFF/NRG2/PGF/PMCH/SEMA4C/SEMA4F/TNF/TYMP/VEGFB/WNT2/CCL7/FSHB/GPHA2/IL25/PDYN/POMC/CMTM2/FGF12/HCRT/INSL5/WNT9A/ADM2/CXCL16/HBEGF/IL19/IL23A/SEMA3B/TNFSF18/AGT/FGF10/IFNL1/INHBE/PTH | 86 |
| MF | GO:0042379 | chemokine receptor binding | 20/2059 | 66/17696 | 3.80E-05 | 0.006807 | 0.006665 | CCL1/CCL16/CCL17/CCL18/CCL22/CCL26/CCL28/CCL4/CCRL2/CXCL1/CXCL10/CXCL13/CXCL2/CXCL3/CXCL9/JAK1/STAT1/STAT3/CCL7/CXCL16 | 20 |
| MF | GO:0008009 | chemokine activity | 16/2059 | 49/17696 | 8.26E-05 | 0.01268 | 0.012416 | CCL1/CCL16/CCL17/CCL18/CCL22/CCL26/CCL28/CCL4/CXCL1/CXCL10/CXCL13/CXCL2/CXCL3/CXCL9/CCL7/CXCL16 | 16 |
| MF | GO:0032813 | tumor necrosis factor receptor superfamily binding | 15/2059 | 46/17696 | 0.000139 | 0.01871 | 0.018321 | CASP8AP2/BID/CASP8/CD40LG/DAB2IP/EDA/FASLG/FEM1B/LTA/MYD88/STAT1/TNF/TRAF1/TRAF3/TNFSF18 | 15 |
| MF | GO:0140375 | immune receptor activity | 29/2059 | 128/17696 | 0.000298 | 0.029802 | 0.029182 | EPOR/KIR2DS5/CCR7/CCRL2/CD200R1/CRLF2/CSF2RA/CXCR3/CXCR6/EBI3/F3/HLA-DOB/IFNGR2/IL12B/IL12RB1/IL13RA2/IL17RA/IL17RB/IL18RAP/IL1RL1/IL21R/IL27RA/IL2RA/IL2RG/IL31RA/IL4R/OSMR/ACKR2/GFRA4 | 29 |
| MF | GO:0003951 | NAD+ kinase activity | 8/2059 | 17/17696 | 0.000305 | 0.029802 | 0.029182 | AGK/CERK/DGKD/DGKE/DGKH/SPHK1/SPHK2/DGKK | 8 |
| MF | GO:0035014 | phosphatidylinositol 3-kinase regulator activity | 8/2059 | 17/17696 | 0.000305 | 0.029802 | 0.029182 | CISH/KLF4/PIK3R5/SOCS1/SOCS3/SOCS5/SOCS6/WDR81 | 8 |
| MF | GO:0001664 | G protein-coupled receptor binding | 52/2059 | 280/17696 | 0.000421 | 0.037693 | 0.036909 | PYY/SAG/SCT/INSL3/ARAP1/ARRB1/C1QBP/CCL1/CCL16/CCL17/CCL18/CCL22/CCL26/CCL28/CCL4/CCRL2/CXCL1/CXCL10/CXCL13/CXCL2/CXCL3/CXCL9/FPR1/GNAI1/GNAL/IL2/JAK1/NEDD4/NPFF/PMCH/PTCH1/RTP4/S1PR2/STAT1/STAT3/TYK2/WNT2/ZNRF3/CCL7/GPHA2/PDYN/POMC/ASIP/HCRT/INSL5/NPB/PTCH2/RSPO4/WNT9A/CXCL16/AGT/PTH | 52 |
