# Supplementary material for: [Retracted] Identification of Biomarkers for Predicting Allograft Rejection following Kidney Transplantation Based on the Weighted Gene Coexpression Network Analysis
Source: Hindawi journal article supplement (doi:10.1155/2021/9933136), 2021-01-01
Supplement: f1 [file 9933136.f1.zip › 9933136.f1/Supplementary material 2.docx]

| **ID** | **Description** | **GeneRatio** | **BgRatio** | **pvalue** | **p.adjust** | **qvalue** | **geneID** | **Count** |
| --- | --- | --- | --- | --- | --- | --- | --- | --- |
| hsa04060 | Cytokine-cytokine receptor interaction | 69/997 | 295/8094 | 5.66E-08 | 1.83E-05 | 1.64E-05 | 2057/3456/3467/3565/2660/650/656/6346/6360/6361/6362/6367/10344/56477/6351/1236/939/959/64109/1438/2919/3627/10563/2920/2921/4283/2833/10663/10148/1896/356/9518/3460/3586/3593/3594/3598/23765/55540/8807/84639/9173/3558/50615/50616/11009/55801/9466/3559/3561/133396/27178/3566/4049/9180/7124/8797/8794/8793/7293/3604/6354/64806/58191/29949/51561/8995/282618/83729 | 69 |
| hsa04061 | Viral protein interaction with cytokine and cytokine receptor | 30/997 | 100/8094 | 1.87E-06 | 0.000303 | 0.000271 | 6346/6360/6361/6362/6367/10344/56477/6351/1236/2919/3627/10563/2920/2921/4283/2833/3586/8807/3558/11009/3559/3561/27178/4049/7124/8797/8794/8793/6354/29949 | 30 |
| hsa04659 | Th17 cell differentiation | 30/997 | 107/8094 | 8.61E-06 | 0.000912 | 0.000817 | 3565/919/916/1147/3112/3460/3594/3558/50615/50616/9466/3559/3561/3566/3662/3716/27040/5602/5600/6300/4772/4792/4794/6772/6774/6777/7297/7535/3320/51561 | 30 |
| hsa04062 | Chemokine signaling pathway | 45/997 | 192/8094 | 1.13E-05 | 0.000912 | 0.000817 | 408/6346/6360/6361/6362/6367/10344/56477/6351/1236/1147/2919/3627/10563/2920/2921/4283/2833/10663/2309/2770/59345/55970/2785/2787/2885/3845/653361/4792/5058/23533/5330/5879/10235/53358/6772/6773/6774/6777/7410/7454/6354/2786/111/58191 | 45 |
| hsa04658 | Th1 and Th2 cell differentiation | 26/997 | 92/8094 | 2.91E-05 | 0.00188 | 0.001685 | 3565/919/916/1147/3112/3460/3593/3594/3558/3559/3561/3566/3716/27040/5602/5600/6300/4772/4792/4794/4853/4854/6772/6777/7297/7535 | 26 |
| hsa04630 | JAK-STAT signaling pathway | 37/997 | 162/8094 | 0.000119 | 0.006247 | 0.005599 | 2057/3456/3467/3565/894/1154/64109/1438/2885/3460/3586/3593/3594/3598/3558/50615/50616/11009/9466/3559/3561/3566/10379/3716/9180/8651/9021/9655/9306/6772/6773/6774/6777/7297/29949/51561/282618 | 37 |
| hsa04380 | Osteoclast differentiation | 31/997 | 128/8094 | 0.000135 | 0.006247 | 0.005599 | 3456/11026/54209/1147/1540/2274/2885/3460/10379/3716/11024/23547/11025/5609/5602/5600/6300/653361/4688/4772/4792/126014/5879/55423/8651/9021/6772/6773/6850/7124/7297 | 31 |
| hsa04668 | TNF signaling pathway | 28/997 | 112/8094 | 0.000158 | 0.006389 | 0.005725 | 3456/329/843/841/1147/2919/3627/2920/2921/153090/10059/3659/4049/5609/5602/5600/6300/197259/4318/4792/11035/9021/7124/7128/7185/7187/192111/4314 | 28 |
| hsa05169 | Epstein-Barr virus infection | 43/997 | 202/8094 | 0.000192 | 0.006888 | 0.006173 | 3456/567/637/811/841/842/894/919/916/965/1147/9541/3627/54205/1871/3065/3280/3112/10379/9636/3716/5609/5602/5600/6300/4615/4734/4792/4794/5701/5706/9861/5879/6772/6773/6774/6850/6891/6892/7124/7128/7187/7297 | 43 |
| hsa04064 | NF-kappa B signaling pathway | 26/997 | 104/8094 | 0.000268 | 0.007798 | 0.006988 | 3929/597/329/84433/6351/959/1147/2919/2920/2921/1540/1896/128178/27040/4049/4615/4792/6850/7124/7128/7185/7187/7329/331/7535/8915 | 26 |
| hsa04625 | C-type lectin receptor signaling pathway | 26/997 | 104/8094 | 0.000268 | 0.007798 | 0.006988 | 841/6361/6367/1147/64581/1540/3586/3593/3558/3659/10379/3845/5602/5600/6300/4772/4792/5058/6772/6773/6850/7124/8915/51561/26253/10332 | 26 |
| hsa04621 | NOD-like receptor signaling pathway | 39/997 | 181/8094 | 0.00029 | 0.007798 | 0.006988 | 3456/9447/329/841/1147/2919/2920/2921/56919/10059/79792/10379/3716/5602/5600/6300/90550/4615/4792/199713/10392/5330/10616/8767/11035/6041/6772/6773/10010/7124/7128/7158/7187/7297/331/7531/838/3320/820 | 39 |
| hsa04657 | IL-17 signaling pathway | 24/997 | 94/8094 | 0.000326 | 0.008091 | 0.007251 | 3565/841/6361/1147/2919/3627/2920/2921/23765/55540/5602/5600/6300/4312/4318/4792/7124/7128/7187/6354/64806/3320/4586/4314 | 24 |
| hsa04217 | Necroptosis | 35/997 | 159/8094 | 0.000383 | 0.008363 | 0.007495 | 3456/5837/246/637/329/841/57132/25978/1540/10059/356/2747/3460/10379/3716/5602/197259/5321/10616/11035/6772/6773/6774/6777/7124/7128/8797/7297/27005/9525/331/815/3320/192111/283748 | 35 |
| hsa05145 | Toxoplasmosis | 27/997 | 112/8094 | 0.000388 | 0.008363 | 0.007495 | 240/329/841/842/959/1147/4261/54205/2770/3112/3460/3586/3593/345611/3716/5602/5600/6300/4615/4792/23533/8651/6772/6774/7124/7297/331 | 27 |
| hsa05152 | Tuberculosis | 37/997 | 180/8094 | 0.001047 | 0.021136 | 0.018943 | 3456/3929/637/843/841/842/4261/64581/54205/8411/3112/3460/3586/3593/3687/3716/3920/5602/5600/6300/4615/5289/5869/5993/8767/8877/56848/6772/6850/10312/7124/815/8915/820/51561/26253/10332 | 37 |
| hsa04622 | RIG-I-like receptor signaling pathway | 18/997 | 70/8094 | 0.001608 | 0.028847 | 0.025852 | 3456/3467/64343/843/841/1147/3627/1540/79132/3593/9636/5602/5600/6300/4792/10010/7124/7187 | 18 |
| hsa04917 | Prolactin signaling pathway | 18/997 | 70/8094 | 0.001608 | 0.028847 | 0.025852 | 894/1154/2309/2885/3659/3845/5602/5600/6300/53358/8651/9021/9655/9306/6772/6774/6777/1586 | 18 |
| hsa05321 | Inflammatory bowel disease | 17/997 | 65/8094 | 0.001758 | 0.02989 | 0.026787 | 3565/3112/3460/3586/3593/3594/8807/3558/50615/50616/3561/3566/4772/6772/6774/7124/51561 | 17 |
| hsa05167 | Kaposi sarcoma-associated herpesvirus infection | 38/997 | 193/8094 | 0.002058 | 0.03324 | 0.02979 | 3456/637/841/842/131450/1147/9976/2919/2920/2921/54205/1871/59345/55970/2785/2787/10379/3716/3845/5609/5602/5600/6300/4772/4792/5289/23533/5879/6772/6773/6774/6850/6932/7187/7297/7314/7538/2786 | 38 |
| hsa04650 | Natural killer cell mediated cytotoxicity | 28/997 | 131/8094 | 0.002251 | 0.034628 | 0.031034 | 3456/3802/3810/115653/369/637/919/356/2885/3002/3460/3845/27040/259197/4772/5058/5879/4068/53358/6850/7124/8797/7410/7535/100132285/3806/79465/117157 | 28 |
| hsa05160 | Hepatitis C | 32/997 | 157/8094 | 0.002555 | 0.036925 | 0.033092 | 9074/3456/1366/369/637/841/842/1147/24146/137075/9073/3627/54205/1871/356/2885/10379/3716/3845/4792/5515/5518/6041/9021/6772/6773/6774/7124/7187/7297/7531/9075 | 32 |
| hsa05142 | Chagas disease | 23/997 | 102/8094 | 0.002629 | 0.036925 | 0.033092 | 3456/811/841/919/916/1147/356/2770/2774/3460/3586/3593/3558/5602/5600/6300/4615/4792/5330/5515/5518/7124/3827 | 23 |
| hsa04660 | T cell receptor signaling pathway | 23/997 | 104/8094 | 0.003417 | 0.045982 | 0.041209 | 3565/84433/919/916/959/1147/2885/3586/3558/3845/27040/5609/5602/5600/6300/4772/4792/4794/5058/7124/7410/7535/8915 | 23 |
